# Supplementary material for: Highly open chalcogenide frameworks built from unusual defective supertetrahedral clusters
Source: Royal Society of Chemistry journal article supplement (doi:10.1039/c9dt01754b), 2019-01-01
Supplement: c9dt01754b1.pdf [file c9dt01754b1.pdf]

*Supporting Information for*

# **Highly Open Chalcogenide Frameworks Built from Unusual Defective Supertetrahedral Cluster**

Chaozhuang Xue, Li Zhang, Xiaoli Wang, Xiang Wang, Jiaxu Zhang and Tao Wu\*

College of Chemistry, Chemical Engineering and Materials Science, Soochow University, Suzhou,  
Jiangsu 215123, China.

## Experimental Section:

**Chemicals and Materials.** Indium powder (In, 99.99%), selenium powder (Se,  $\geq 99.5\%$ ), 3, 5-dimethylpiperidine ( $C_7H_{15}N$ ,  $\geq 99\%$ ), 3-methylpiperidine ( $C_6H_{13}N$ ,  $\geq 99.5\%$ ), amino trimethylene phosphonic acid (ATMP, 50%, liquid) and deionized water all used without any further purification.

**Synthesis of CSZ-11:** The mixture of indium (80 mg), selenium (250 mg), 3, 5-dimethylpiperidine (2.5 mL), deionized water (1 mL) and amino trimethylene phosphonic acid (1 mL) were added into a 23 mL Teflon-lined stainless steel autoclave, and stirred for 2 h at room temperature. The vessel was then sealed and heated at 170 °C for 5 days. The autoclave was subsequently allowed to cool to room temperature. 20 mg of saffron-yellow prismatic crystals were obtained.

**Synthesis of CSZ-12:** The mixture of indium (80 mg), selenium (250 mg), 3-methylpiperidine (2.5 mL) and deionized water (1 mL) were added into a 23 mL Teflon-lined stainless steel autoclave, and stirred for 2 h at room temperature. The vessel was then sealed and heated at 170 °C for 5 days. The autoclave was subsequently allowed to cool to room temperature. 80 mg of saffron-yellow prismatic crystals were obtained.

**Structure Characterization.** The single-crystal X-ray diffraction measurements was performed on a Bruker Smart CPAD area diffractometer with nitrogen-flow temperature controller using graphite-monochromated  $MoK\alpha$  ( $\lambda = 0.71073 \text{ \AA}$ ) radiation at 120 K. The absorption correction on CSZ-11 and CSZ-12 were performed using program of 'multi-scan' in APEX 3 with the input parameters including Mean  $I/\sigma(I)$  Threshold : 1.5, high resolution threshold: 0.1, factor g for initial weighting scheme: 0.04, Restraint EDS for scale factors: 0.005, absorption type: medium absorber, number of refinement cycles: 50, marquardt damping factor: 0.0001. The structure was solved by direct method using SHELXS-2014 and the refinement against all reflections of the compounds was performed using SHELXL-2014. Solvent molecules were removed from the data set using the SQUEEZE routine of PLATON and refined further using the data generated. Powder X-ray diffraction (PXRD) data were collected on a desktop diffractometer (D2 PHASER, Bruker, Germany) using  $Cu-K\alpha$  ( $\lambda=1.54056 \text{ \AA}$ ) radiation operated at 30 kV and 10 mA.

**Elemental Analysis.** Energy dispersive spectroscopy (EDS) analysis was performed on scanning electron microscope (SEM) equipped with energy dispersive spectroscopy (EDS) detector. An accelerating voltage of 25 kV and 40 s accumulation time were applied.

**Thermogravimetric (TG) Measurement.** A Shimadzu TGA-50 thermal analyzer was used to

measure the TG curve by heating the sample from room temperature to 800 °C with heating rate of 10 °C/min under N<sub>2</sub> flow.

**Optical Measurements:** Room-temperature solid-state UV-vis diffusion reflectance spectra of crystal samples were measured on a SHIMADZU UV-3600 UV-Vis-NIR spectrophotometer, by using BaSO<sub>4</sub> powder as the reflectance reference. The absorption spectra were calculated from reflectance spectra by using the Kubelka-Munk function:  $F(R)=\alpha/S=(1-R)^2/2R$ , where  $R$ ,  $\alpha$ , and  $S$  are the reflection, the absorption and the scattering coefficient, respectively. In order to determine band edge of the direct gap semiconductor, the relation between the absorption coefficients ( $\alpha$ ) and the incident photon energy ( $h\nu$ ) is exhibited as  $\alpha h\nu = A(h\nu - E_g)^{1/2}$ , where  $A$  is a constant that relates to the effective masses associated with the valence and conduction bands, and  $E_g$  is the optical transition gap of the solid material. The band gap of the obtained samples can be determined from the Tauc plot with  $[F(R)*h\nu]^2$  vs.  $h\nu$  by extrapolating the linear region to the abscissa.

**Ion-Exchange Experiments.** Typically, 10 mg of as-synthesized sample was added into 10 mL of aqueous solution of standard Cs<sup>+</sup> solution (1 M). The mixture was kept shaking for 15–18 h at room temperature. And then the sample with darker color were isolated by filtration and washed by water and ethanol for several times.

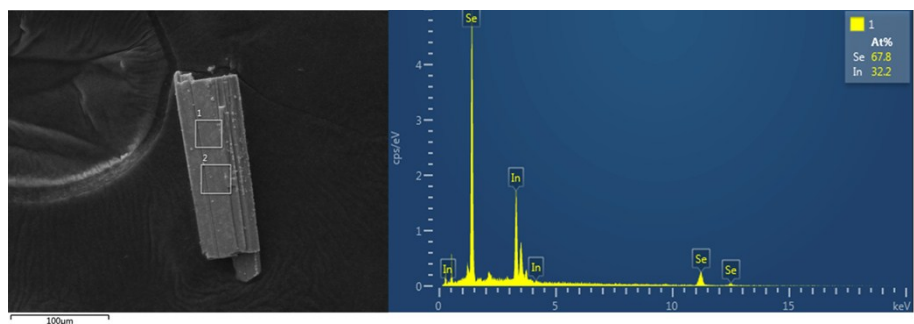

**Fig. S1** SEM image (left) and energy (right) dispersive spectroscopy (EDS) of CSZ-11.

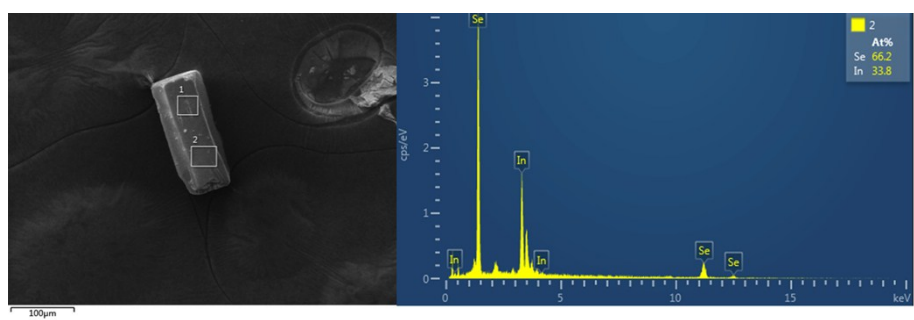

**Fig. S2** SEM image (left) and energy (right) dispersive spectroscopy (EDS) of CSZ-12.

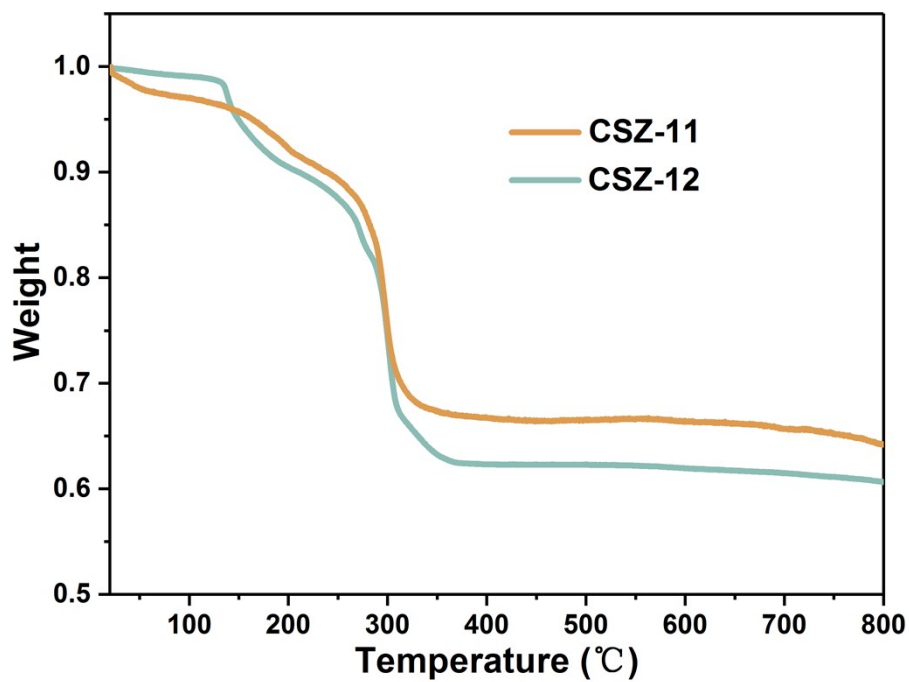

**Fig. S3** TGA curves of CSZ-11 and CSZ-12.

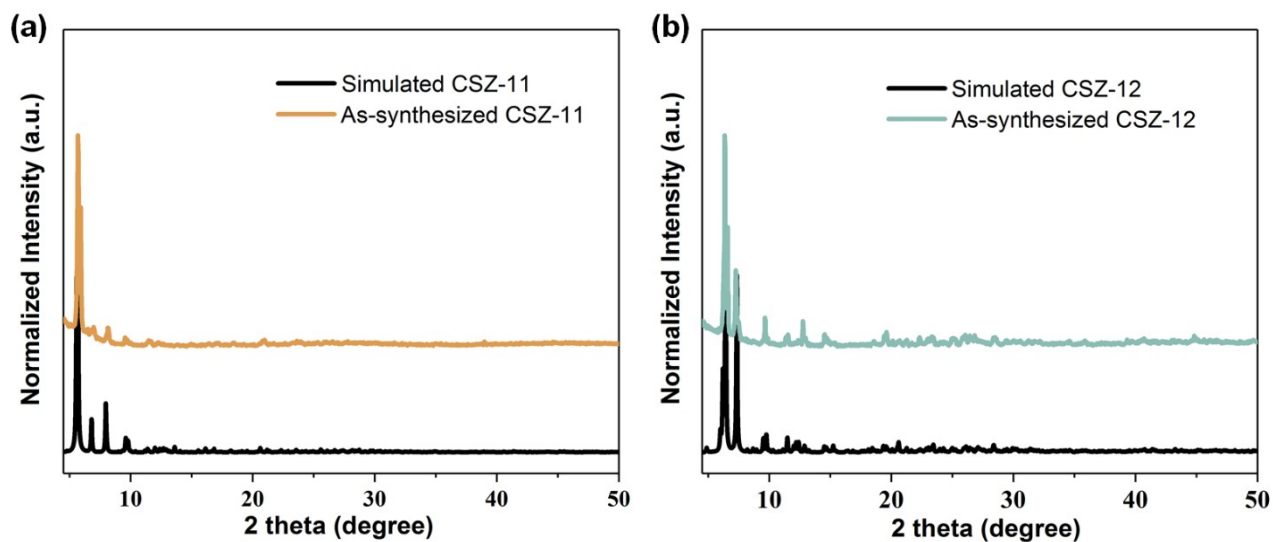

**Fig. S4** Powder X-ray diffraction (PXRD) patterns of the simulated structure models and as-synthesized samples of CSZ-11 (a) and CSZ-12 (b).

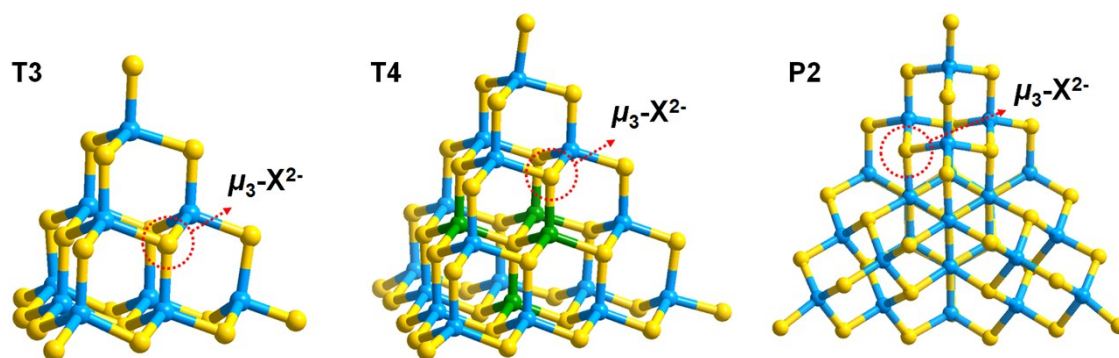

**Fig. S5** T3, T4 and P2 clusters (red dotted-line:  $\mu_3\text{-X}^{2-}$ , X = S/Se).

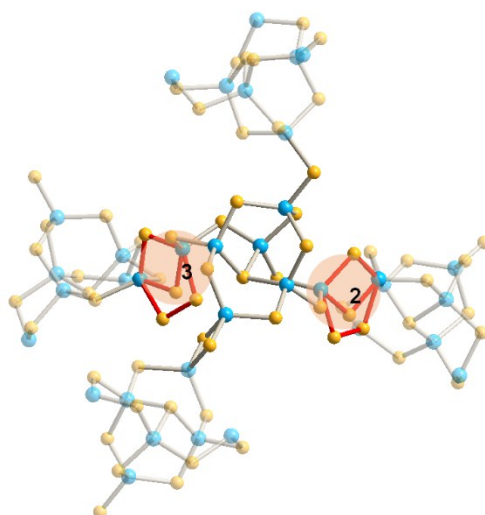

**Fig. S6** Five-membered ring of  $\text{In}_2\text{Se}_3$  and four-membered ring of  $\text{In}_2\text{Se}_2$  are position-shared at site 2 and 3 in CSZ-11.

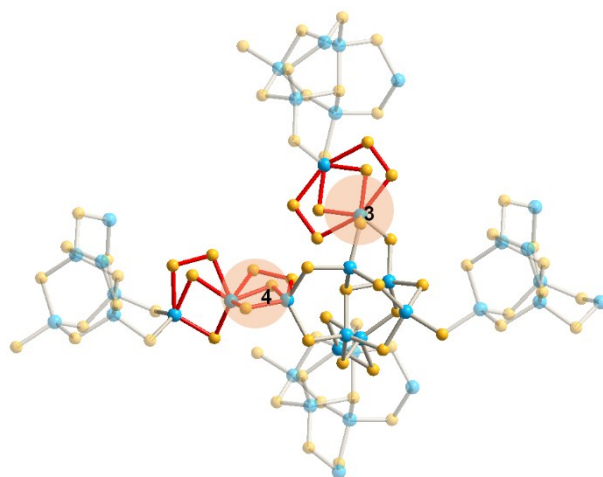

**Fig. S7** Disorder linkers at site 3 and 4 in CSZ-12.

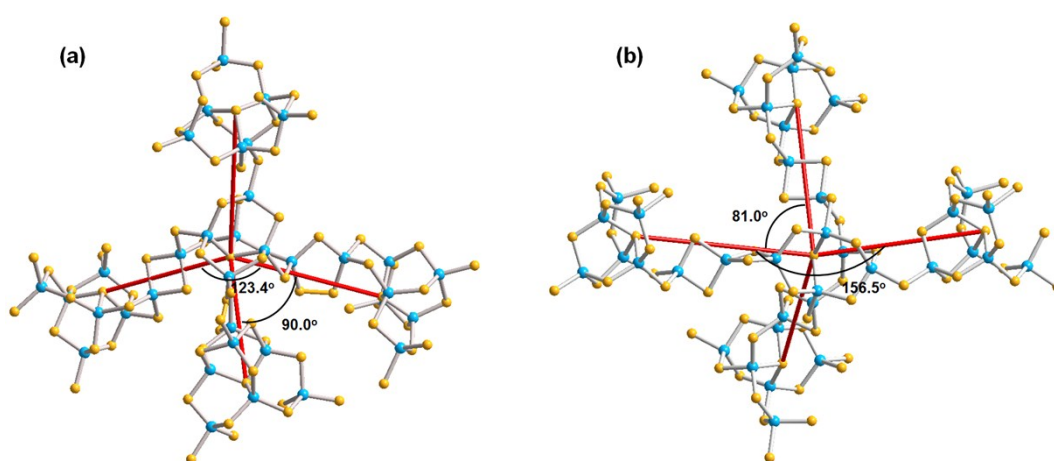

**Fig. S8** The maximum angle and minimum angle of the adjacent three clusters in CSZ-11 (a) and CSZ-12 (b).

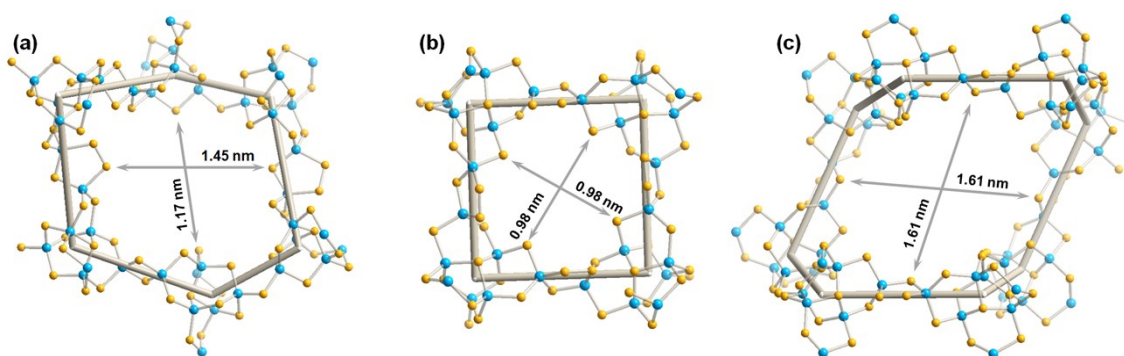

**Fig. S9** Three kinds of window in CSZ-11. (a) Six-membered ring of window A (viewed from  $a/b$ -axis). (b) Four-membered ring of window B (viewed from  $c$ -axis). (c) Eight-membered ring of window C (viewed from  $c$ -axis).

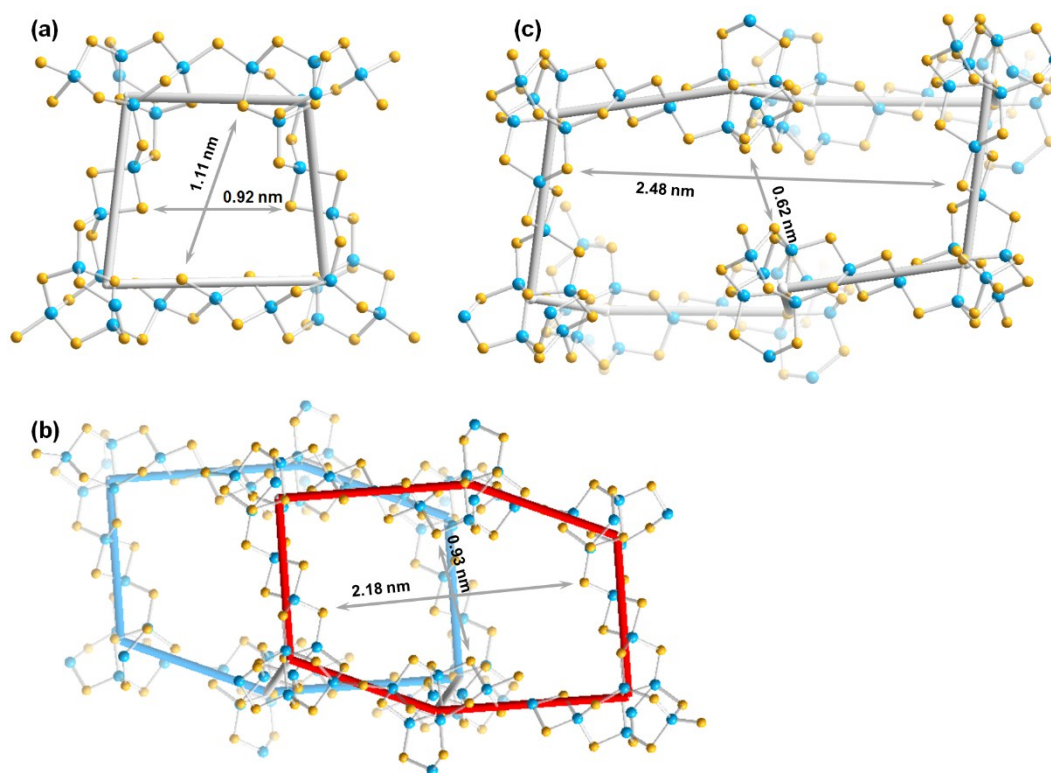

**Fig. S10** Three kinds of windows in CSZ-12. (a) Four-membered ring of window D (viewed from  $a$ -axis). (b) Interlaced six-membered ring of window E (viewed from  $b$ -axis). (c) Ten-membered ring of window F (viewed from  $c$ -axis).



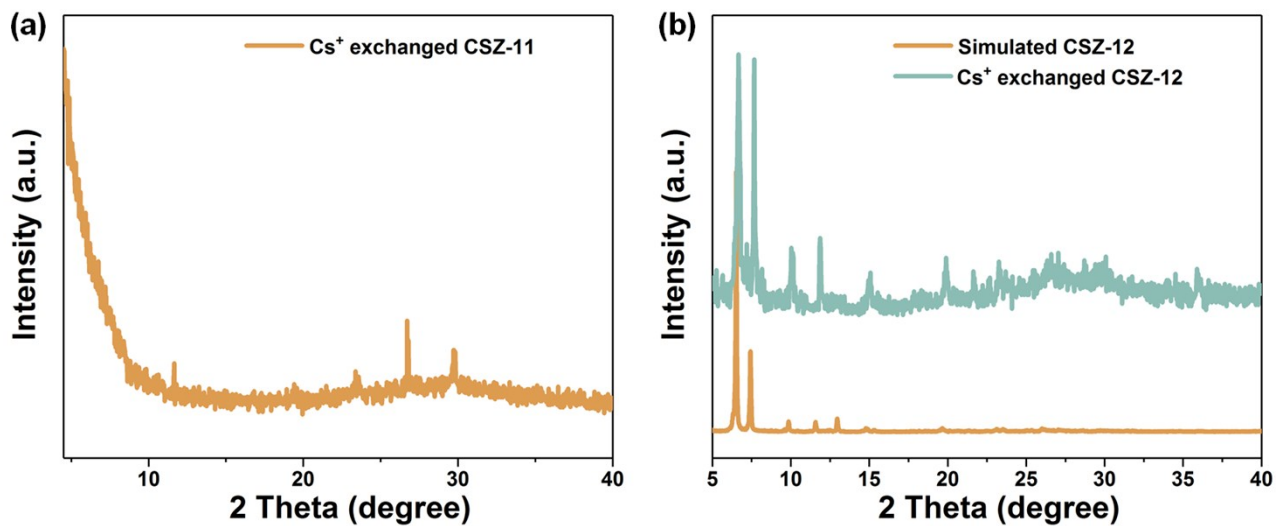

Fig. S11 PXR D patterns of Cs<sup>+</sup> exchanged CSZ-11 (a) and CSZ-12 (b).

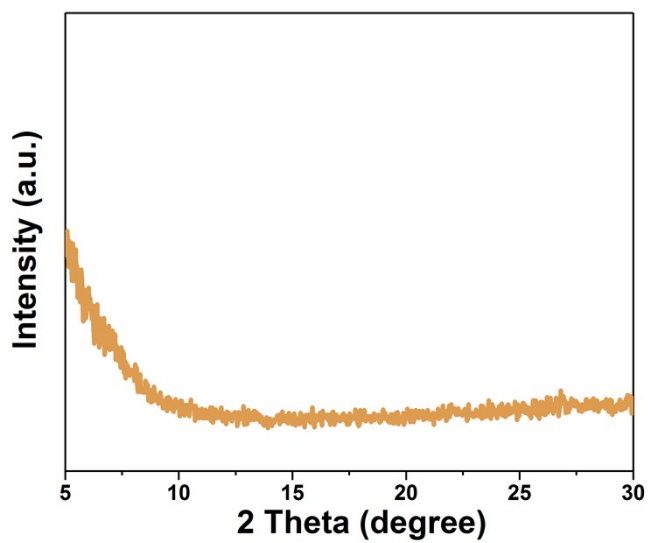

Fig.S12 PXR D pattern of CSZ-12 after degassing process.

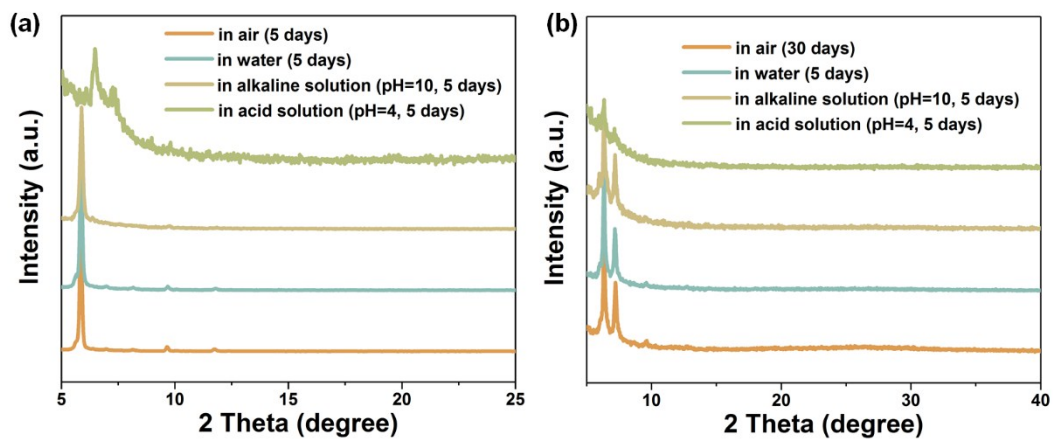

Fig. S13 The powder X-ray diffraction patterns for **CSZ-11** (a) and **CSZ-12** (b) after exposed in different conditions with several days.

**Table S1.** Crystal data and structure refinement parameters for **CSZ-11** and **CSZ-12**.

| <b>Compounds</b>                                                            | <b>CSZ-11</b>  | <b>CSZ-12</b>  |
|-----------------------------------------------------------------------------|----------------|----------------|
| Crystal system                                                              | tetragonal     | monoclinic     |
| Space group                                                                 | <i>P4/ncc</i>  | <i>C2/c</i>    |
| <i>Z</i>                                                                    | 1              | 1              |
| <i>a</i> (Å)                                                                | 31.0100 (17)   | 27.6136 (10)   |
| <i>b</i> (Å)                                                                | 31.0100 (17)   | 24.8147 (10)   |
| <i>c</i> (Å)                                                                | 36.8077 (14)   | 24.0930 (9)    |
| $\alpha$ (deg.)                                                             | 90             | 90             |
| $\beta$ (deg.)                                                              | 90             | 93.6160        |
| $\gamma$ (deg.)                                                             | 90             | 90             |
| <i>V</i> (Å <sup>3</sup> )                                                  | 35395 (4)      | 16476.2(10)    |
| GOF on <i>F</i> <sup>2</sup>                                                | 1.028          | 1.147          |
| <i>R</i> <sub>1</sub> , <i>wR</i> <sub>2</sub> ( <i>I</i> > 2σ( <i>I</i> )) | 0.066, 0.1835  | 0.0519, 0.1704 |
| <i>R</i> <sub>1</sub> , <i>wR</i> <sub>2</sub> (all data)                   | 0.1083, 0.2165 | 0.0873, 0.1960 |

**Table S2.** Elemental analysis results of **CSZ-11** and **CSZ-12**.

| <b>Elements (wt.)</b>          | <b>N (%)</b> | <b>C (%)</b> | <b>H (%)</b> |
|--------------------------------|--------------|--------------|--------------|
| Calculated for <b>CSZ-11</b>   | 3.9          | 23.5         | 4.5          |
| Experimental for <b>CSZ-11</b> | 3.7          | 24.0         | 4.6          |
| Calculated for <b>CSZ-12</b>   | 3.4          | 17.7         | 3.2          |
| Experimental for <b>CSZ-12</b> | 3.5          | 16.0         | 3.3          |
